# Supplementary material for: Changes in precipitation may alter food preference in an ecosystem engineer, the black land crab, Gecarcinus ruricola
Source: PeerJ. 2019 May 8;7:e6818. doi: 10.7717/peerj.6818 (PMC6511230; doi:10.7717/peerj.6818)
Supplement: Supplemental Information 2 — This is data for wet and dry feeding, it contains embedded calculations [file peerj-07-6818-s002.xlsx]

## Sheet: Sheet1
							0 days dehydrate
crabmass	wet lettuce		crabmass	dry lettuce		crabmass	wet apple		crabmass	dry apple		crabmass	wet fish		crabmass	dry fish
271	1.29011	f	274	0	m	194	0	f	198	1.24314	f	305	0.153317	f	279	0.21173	m
231	1.24434	m	262	0	m	128	1.85632	f	210	0.774005	m	284	2.92253	m	236	0.0966823	f
115	1.81468	m	107	0.558198	f	296	1.86972	m	198	1.45836	m	192	3.82142	f	232	0.268482	m
179	1.66548	m	203	0	m	192	0.502292	f	160	0.217323	m	283	3.18271	m	151	0.73882	f
221	1.76484	m	261	0.413742	m	158	3.0875	f	220	1.31984	f	199	0	m	157	0	f
203	0.62341	f	275	0.106845	m	188	3.15477	f	186	0.634369	f	213	7.41827	m	225	0.112931	m
199	0.219222	m	221	0.461884	m	205	0.349039	m	338	0.806872	m	180	0.108015	m	368	0.0288661	m
298	1.61152	m	366	0	m	386	2.68285	m	158	1.5548	m	387	1.78407	f	287	0	f
128	0.212019	f	204	0	m	106	4.69527	m	166	0.126457	m	206	0.902296	m	433	0	m
284	1.35575		276	0	m	279	2.30402	m	225	0.907178	m	229	1.16258	f	360	0.273344	m
331	1.10041	m	156	0.140822	m	210	3.08504	f	214	0.40823	m	281	3.82116	m	456	0	m
360	0.84325	m	425	0	m	128	3.33717	f	225	0.585902	m	273	0.761305	f	330	1.29852	m
120	2.1037	f	224	0	f	430	2.63206	m	377	0.982756	m	351	1.41308	m	329	0	m
114	0.319959	m	380	0.0459613	m	328	3.46977	m	384	0.337813	m	378	0	m	290	0.543168	f
							4 days dehydrate
crabmass	wet lettuce		crabmass	dry lettuce		crabmass	wet apple		crabmass	dry apple		crabmass	wet fish		crabmass	dry fish
263	1.48233	m	286	0	m	285	2.85754	m	174	0	f	193	3.59162	f	257	0	f
194	0.523201	m	276	0.0898605	m	261	0.574269	f	251	0.537038	m	343	4.30246	m	121	0.186343	f
216	0.264381	m	144	0.253391	f	227	2.73682	m	173	0	m	178	6.18211	f	182	0.36299	f
180	1.44668	f	280	0.0739793	m	191	0.369633	m	143	0	m	439	1.43594	m	208	0.879481	m
146	0.862921	f	252	0	m	161	0.484284	m	187	0.120973	m	171	3.83842	m	157	0	f
179	0.420197	f	210	0	f	201	2.47556	f	187	0.569152	m	316	3.21573	m	224	0.0943474	f
299	0	m	219	0	m	193	2.84022	m	297	0.975487	f	314	9.2923	m	163	0	m
188	0.386589	f	289	0.428949	m	360	2.31629	m	186	0.399808	m	325	4.7877	m	287	0	m
121	1.76561	f	282	0	m	264	2.53667	m	200	0.588013	m	215	8.0449	f	216	0	m
134	1.46272	m	152	0	m	208	3.3101	m	143	0.604979	m	424	1.76235	m	212	0.0236064	f
219	0.385438	m	157	0	f	157	4.63001	m	292	0.575204	m	383	4.55595	m	157	0	m
180	0.423577	m	174	0.203077	m	118	3.75175	f	192	0	f	333	2.9742	m	461	0.111261	m
200	0.604317	f	223	0	f	441	3.038	m	275	0.794135	f	325	4.64484	m	332	0.622315	m
322	0.42995	m	174	0	f	444	3.01884	m	282	1.24406	f	339	4.77241	m	293	0.0661687	f
							8 days dehydrate
crabmass	wet lettuce		crabmass	dry lettuce		crabmass	wet apple		crabmass	dry apple		crabmass	wet fish		crabmass	dry fish
173	0	f	305	0	m	84	0	m	152	0	f	297	0	m	331	0	m
125	0	f	314	0	m	197	3.37171	f	214	0	m	291	1.98947	f	261	0	f
204	0.10369	m	246	0	f	301	0.151558	m	323	0	m	272	2.72738	m	284	0	f
236	0	m	177	0	f	279	0.16591	m	395	0.0458115	m	245	0.666932	f	234	0	m
215	0.19817	m	167	0	f	267	4.12317	m	240	0.162635	f	304	0.648293	f	265	0	m
196	0.282	m	151	0	m	401	3.35326	f	304	0	f	309	0.530701	m	226	0	f
208	0.20744	m	194	0	f	314	3.78042	m	274	1.01875	f	286	1.65114	m	243	0.163121	f
223	1.58144	m	125	0	f	226	0.212788	f	181	0	f	292	0.83482	f	284	0.559801	f
280	1.1708	m	188	0.0851312	f	188	2.79888	m	178	0	f	382	2.84218	m	239	0	m
194	2.39828	f	151	0.200324	f	236	1.00386	m	197	0	m	202	4.23694	f	199	0	m
119	0.970341	f	207	0	m	239	2.85923	m	227	0.447602	f	261	1.4754	f	186	0	f
186	0.788175	m	178	0.0814603	m	293	2.97618	m	210	1.08274	f	162	1.04243	m	181	0	f
313	1.69049	m	402	0	m	241	3.31617	m	313	0.358994	m	157	1.53909	f	216	0	f
322	0.265323	m	437	0	m	207	3.66832	f	473	0.388982	m	199	2.30702	m	253	0	f
